# Supplementary material for: Yeast Smell Like What They Eat: Analysis of Volatile Organic Compounds of Malassezia furfur in Growth Media Supplemented with Different Lipids
Source: MDPI journal article supplement (doi:10.3390/molecules24030419), 2019-01-24
Supplement: s1 [file s1]

Article

Yeast smell like what they eat: Analysis of Volatile Organic Compounds of

*Malassezia furfur* in growth media supplemented with different lipids

**Mabel González<sup>1</sup>, Adriana M. Celis<sup>2,3\*</sup>, Marcela I. Guevara-Suarez<sup>2,3</sup>, Jorge Molina<sup>4</sup> and Chiara Carazzone<sup>1\*</sup>**

<sup>1</sup> Laboratory of Advanced Analytical Techniques in Natural Products (LATNAP), Universidad de los Andes, Cra 1 No. 18A-12, Bogotá, ZIP Code 111711, Cundinamarca, Colombia; mabel.c.gonzalez@uniandes.edu.co (M.G.); c.carazzone@uniandes.edu.co (C.C.)

<sup>2</sup> Grupo de Investigación Celular de Microorganismos Patógenos (CeMoP), Universidad de los Andes, Cra 1 No. 18A-12, Bogotá, ZIP Code 111711, Cundinamarca, Colombia; acelis@uniandes.edu.co (A.C.); mi.guevara34@uniandes.edu.co (M.I.G.)

<sup>3</sup> Laboratorio de Micología y Fitopatología (LAMFU), Universidad de los Andes, Cra 1 No. 18A-12, Bogotá, ZIP Code 111711, Cundinamarca, Colombia; acelis@uniandes.edu.co (A.C.); mi.guevara34@uniandes.edu.co (M.I.G.)

<sup>4</sup> Centro de Investigaciones en Microbiología y Parasitología Tropical (CIMPAT), Universidad de los Andes, Cra 1 No. 18A-12, Bogotá, ZIP Code 111711, Cundinamarca, Colombia; jmolina@uniandes.edu.co (J.M.)

\* Correspondence: c.carazzone@uniandes.edu.co; Tel.: +57-13394949 Ext. 1480. acelis@uniandes.edu.co (A.C.); Tel.: +57-13394949 Ext. 3757

Received: date; Accepted: date; Published: date

## SUPPORTING INFORMATION

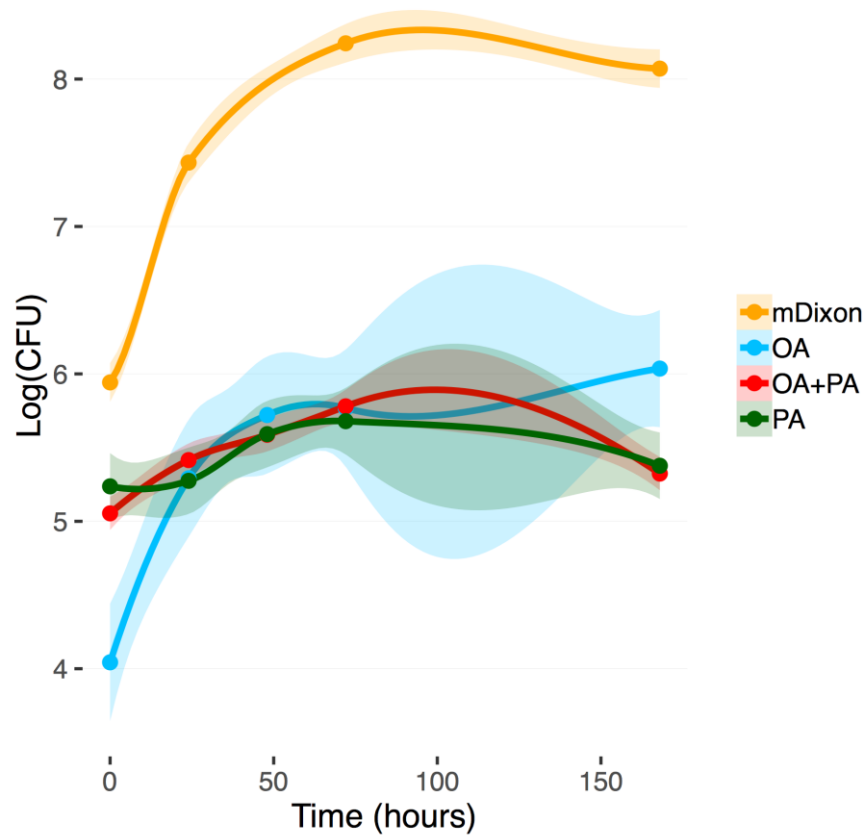

**Figure S1.** Growth curves of *M. furfur* in mDixon, oleic acid (OA), palmitic acid (PA) and OA+PA medium and their confidence intervals of 99% using a loess method.

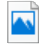

3-FigureS2.gif

**Figure S2.** Animation of rotational distribution of data in the PCA analysis of the volatiles' profiles of *M. furfur* growing in eight different experimental treatments.

**Table S1.** Significant statistical univariate parameters found on 17 VOCs from *M. furfur* and compounds highlighted by PCA and PLS-DA.

| Compound                                                 | Statistics from ANOVA |         | Statistics from Kruskal-Wallis |         | PCA | PLS-DA |
|----------------------------------------------------------|-----------------------|---------|--------------------------------|---------|-----|--------|
|                                                          | F                     | pval    | K                              | pval    |     |        |
| Carbon dioxide                                           | 16.1                  | < 0.001 | 25.8                           | < 0.001 | ✓   | ✓      |
| Octane                                                   | 36.8                  | < 0.001 | 33.8                           | < 0.001 |     | ✓      |
| <del>4</del> -Hexan- <del>1</del> -ol                    | 92.5                  | < 0.001 | 34.6                           | < 0.001 | ✓   | ✓      |
| Nonane                                                   | 13.5                  | < 0.001 | 26.7                           | < 0.001 |     |        |
| <del>2</del> -Pentan- <del>2</del> -one                  | 13.1                  | < 0.001 | 25.7                           | < 0.001 |     |        |
| 3-methyl <del>4</del> -butan- <del>1</del> -ol           | 6.9                   | < 0.001 | 20.3                           | 0.0049  |     |        |
| <del>4</del> -Butan- <del>1</del> -ol                    | 7.2                   | < 0.001 | 32.8                           | < 0.001 |     | ✓      |
| <del>6</del> -Hept- <del>6</del> -en-1-ol                | 106.8                 | < 0.001 | 22.4                           | 0.0022  |     | ✓      |
| <del>cis</del> - <del>2</del> -NonenePentyl acetate      | 132.1                 | < 0.001 | 22.4                           | 0.0022  | ✓   | ✓      |
| Isomer5 of methyldecane                                  | 56.2                  | < 0.001 | 22.0                           | 0.0025  | ✓   | ✓      |
| Dimethyl sulfide                                         | 29.9                  | < 0.001 | 14.3                           | 0.0450  | ✓   | ✓      |
| <del>5</del> -Undec- <del>5</del> -ene                   | 371.0                 | < 0.001 | 22.4                           | 0.0022  | ✓   | ✓      |
| Isomer2 of methylundecane                                | 94.5                  | < 0.001 | 22.0                           | 0.0026  | ✓   | ✓      |
| Isomer1 of methyldecane                                  | 133.7                 | < 0.001 | 22.0                           | 0.0026  | ✓   | ✓      |
| <del>1,2</del> -Epoxyundecane <del>2</del> -Nonyloxirane | 51.0                  | < 0.001 | 19.0                           | 0.0083  |     | ✓      |
| Isomer3 of methyldecane                                  | 4.0                   | 0.0030  | 15.9                           | 0.0258  |     |        |
| 2-methyl-tetrahydrofuran                                 | 116.2                 | < 0.001 | 22.2                           | 0.0023  | ✓   | ✓      |

**Formatted:** Font: Palatino Linotype, 10 pt

**Formatted:** List Paragraph, Bulleted + Level: 1 +  
Aligned at: 0.63 cm + Indent at: 1.27 cm

Table S2. Chemical composition of mDixon medium.

| Component         | Description or molecular structure                                                                                                                                                                | Percentage |
|-------------------|---------------------------------------------------------------------------------------------------------------------------------------------------------------------------------------------------|------------|
| malt extract      | Bile composition (water 92 g/dL, bile salts 6 g/dL, bilirubin 0.3 g/dL, cholesterol 0.3 to 0.9 g/dL, FA 0.3 to 1.2 g/dL, lecithin 0.3 g/dL and 200 meq/L inorganic salts [1])                     | 3.6        |
| desiccated oxbile | Lecithins: phospholipids, glycolipids or triglyceride. Glycerophospholipids as phosphatidylcholine, phosphatidylethanolamine, phosphatidylinositol, phosphatidylserine, and phosphatidic acid [2] | 2.0        |
| peptone           | Natural sources of amino-acids, peptides and proteins                                                                                                                                             | 0.6        |
| glycerol          | 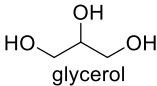<br>glycerol                                                                                                     | 0.2        |
| oleic acid        | <br>oleic acid                                                                                                  | 0.2        |
| Tween 40          | <br>2-(2-(3,4-bis(2-methoxyethoxy)tetrahydrofuran-2-yl)-2-(2-methoxyethoxy)ethoxy)ethyl palmitate              | 1          |

**Table S3.** Chemical composition of oleic acid (OA), palmitic acid (PA) and OA+PA media. The components of the minimal medium (MM) are listed in Materials and Methods.

| Medium | Components       | Components found in the GC-FID analysis[3] or molecular structure                                          | Percentage |
|--------|------------------|------------------------------------------------------------------------------------------------------------|------------|
| OA     | 1% of Oleic acid | 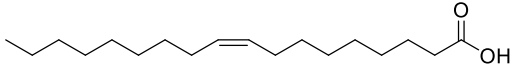<br>oleic acid           | 78%        |
|        |                  | <br>linoleic acid        | 10%        |
|        |                  | <br>palmitoleic acid     | 3%         |
|        |                  | <br>elaidic acid         | 2%         |
|        |                  | <br>palmitic acid        | 6%         |
|        |                  | <br>heptadecanoic acid | 1%         |

1% Tween 40

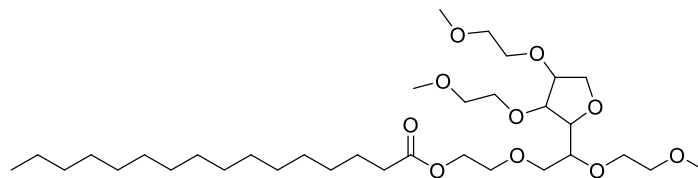

2-(2-(3,4-bis(2-methoxyethoxy)tetrahydrofuran-2-yl)-2-(2-methoxyethoxy)ethoxy)ethyl palmitate

MM

1% of a mixture  
50:50 of Oleic acid  
and Palmitic acid

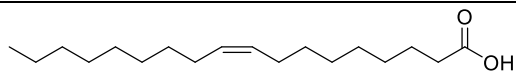

oleic acid

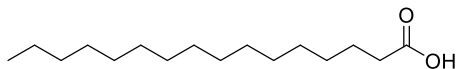

palmitic acid

OA+PA

1% Tween 40

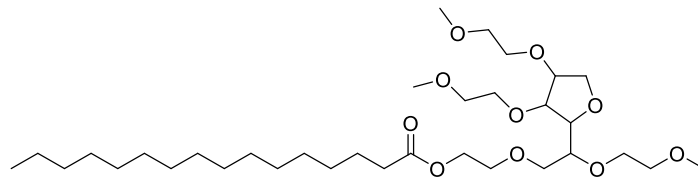

2-(2-(3,4-bis(2-methoxyethoxy)tetrahydrofuran-2-yl)-2-(2-methoxyethoxy)ethoxy)ethyl palmitate

1% Brij-58

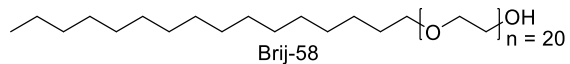

Brij-58

MM

PA

1% of Palmitic  
acid

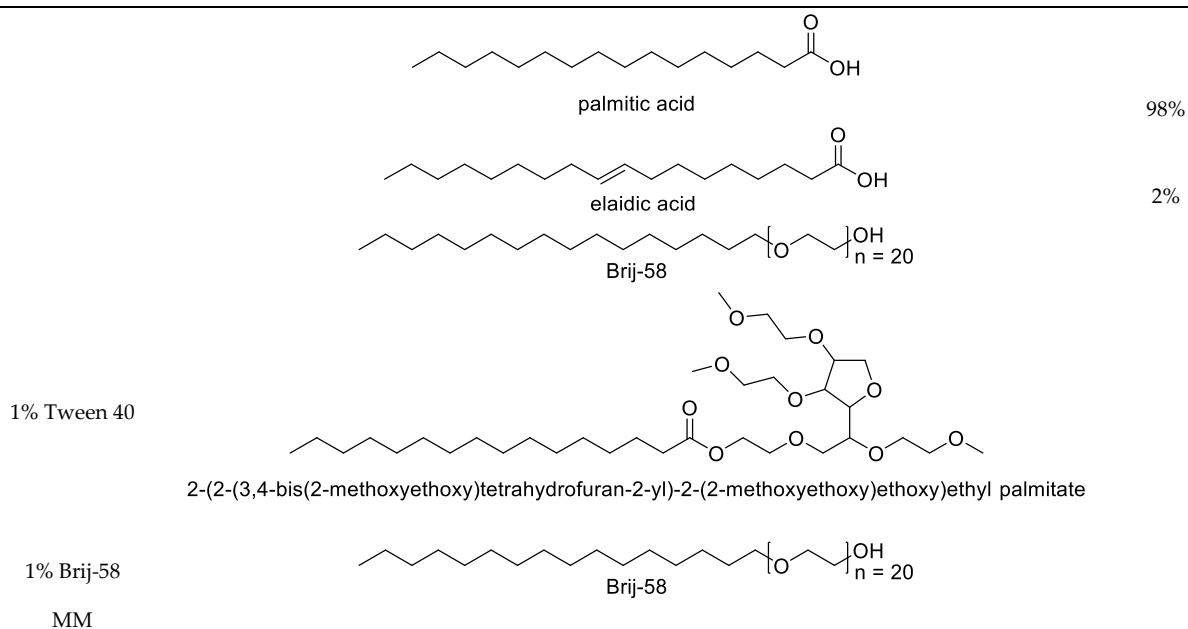

## References

1. Chopra, T.; Gokhale, R.S. *Chapter 12 Polyketide versatility in the biosynthesis of complex mycobacterial cell wall lipids*; 1st ed.; Elsevier Inc., 2009; Vol. 459; ISBN 9780123745910.
2. Celis, A.M. Unraveling lipid metabolism in lipid-dependent pathogenic *Malassezia* yeasts. Ph.D. Thesis, Utrecht University, 2017.
3. Triana, S.; de Cock, H.; Ohm, R.A.; Danies, G.; Wösten, H.A.B.; Restrepo, S.; González Barrios, A.F.; Celis, A. Lipid metabolic versatility in *Malassezia* spp. yeasts studied through metabolic modeling. *Front. Microbiol.* **2017**, *8*, 1–18, doi:10.3389/fmicb.2017.01772.
